# Supplementary material for: Extrusion-Based 3D Printing of Poly(ethylene glycol) Diacrylate Hydrogels Containing Positively and Negatively Charged Groups
Source: Gels. 2018 Aug 14;4(3):69. doi: 10.3390/gels4030069 (PMC6209279; doi:10.3390/gels4030069)
Supplement: Supplementary file 1 [file gels-04-00069-s001.pdf]

**Extrusion-based 3D printing of poly(ethylene glycol) diacrylate hydrogels  
containing positively and negatively charged groups**

*Sebastian Joas, Günter E.M. Tovar, Oguz Celik, Christian Bonten, Alexander Southan*

**Table of contents**

|                                                                                 |   |
|---------------------------------------------------------------------------------|---|
| 1. Storage and loss moduli of physical hydrogels .....                          | 2 |
| 2. Recovered yield of Poloxamer 407 upon hydrogel washing .....                 | 2 |
| 3. Temperature-dependent rheology of hydrogel formulations .....                | 3 |
| 4. Shear stress during 3D printing according to the Herschel-Bulkley model..... | 4 |
| 5. Viscosity recovery of hydrogel formulations after shearing .....             | 4 |

## 1. Storage and loss moduli of physical hydrogels

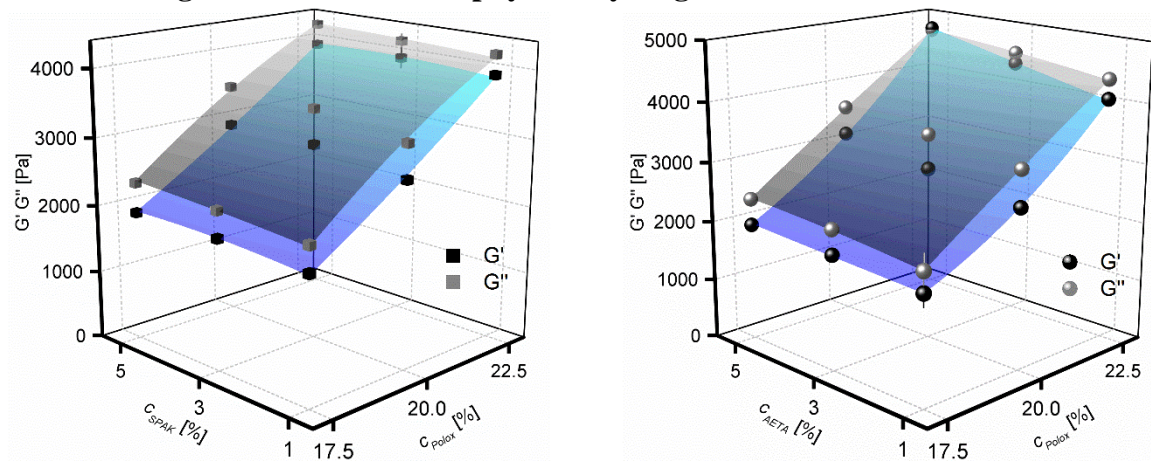

FIGURE S1 Storage moduli  $G'$  and loss moduli  $G''$  of hydrogel formulations containing SPAK (left) and AETA (right) measured 10 °C above the gel transition temperature. The surface fits to the data are for the guidance of the eye only.

## 2. Recovered yield of Poloxamer 407 upon hydrogel washing

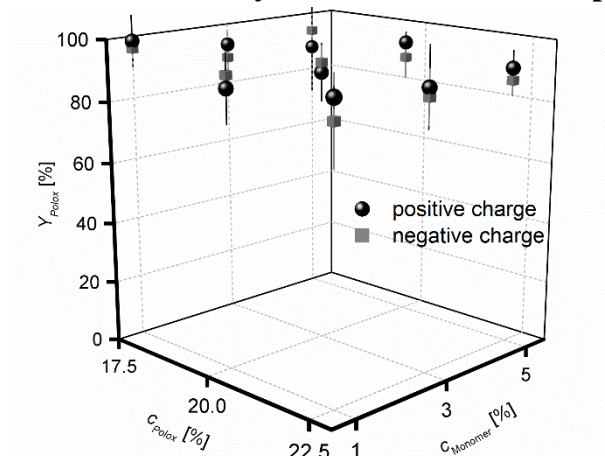

FIGURE S2 Recovered yield of Poloxamer 407 upon washing of the hydrogels.

### 3. Temperature-dependent rheology of hydrogel formulations

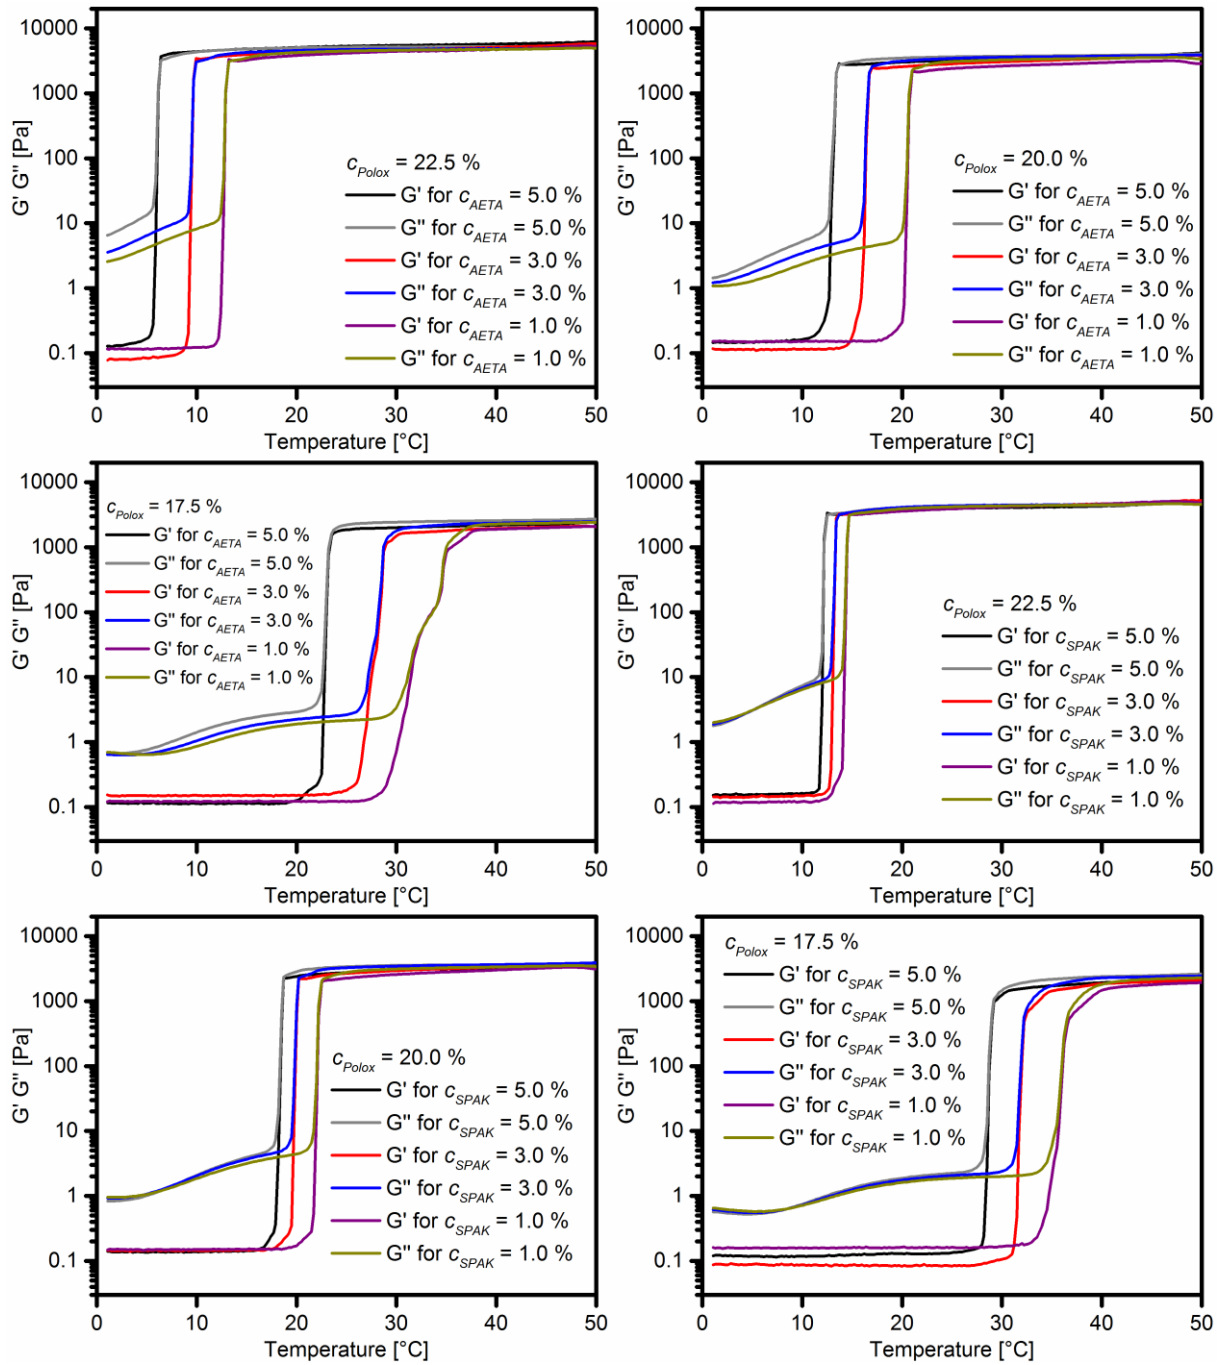

FIGURE S3 Temperature-dependent rheological measurements of all hydrogel formulations used in this study.

#### 4. Shear stress during 3D printing according to the Herschel-Bulkley model

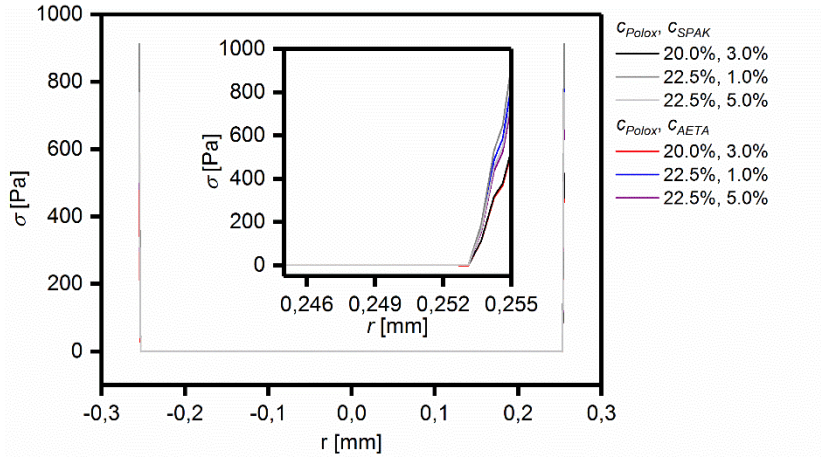

FIGURE S4 Calculated shear stress profiles of the different Herschel-Bulkley liquids from the manuscript which have a  $c_{Polox} \geq 20\%$ .

#### 5. Viscosity recovery of hydrogel formulations after shearing

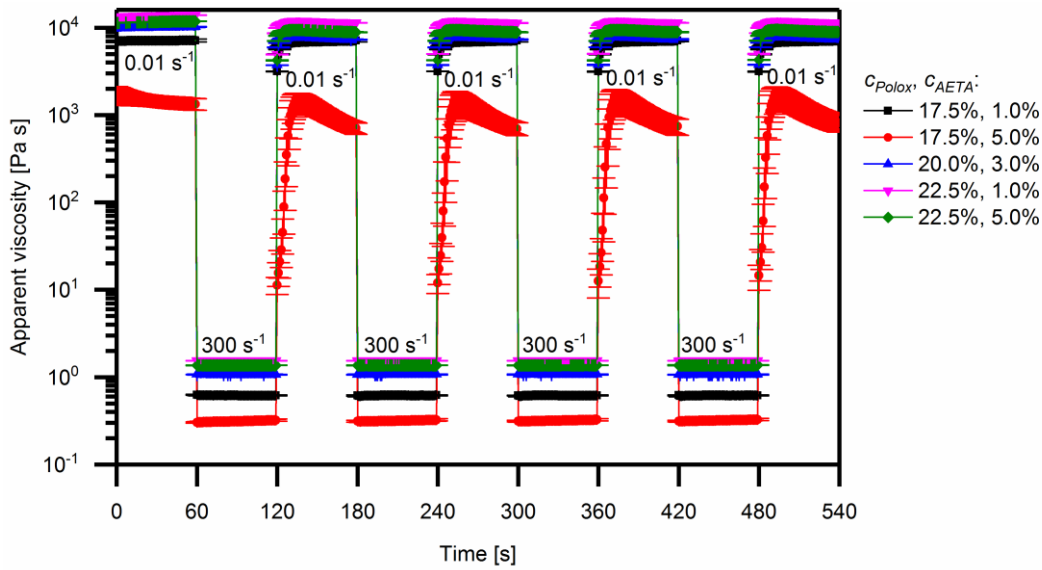

FIGURE S5 Viscosity recovery of hydrogel formulations containing AETA in an experiment with sudden changes between low shear rates ( $0.01 \text{ s}^{-1}$ ) and high shear rates ( $300 \text{ s}^{-1}$ ).

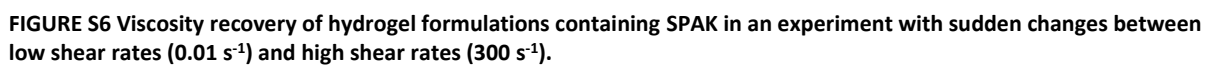

**FIGURE S6 Viscosity recovery of hydrogel formulations containing SPAK in an experiment with sudden changes between low shear rates ( $0.01 \text{ s}^{-1}$ ) and high shear rates ( $300 \text{ s}^{-1}$ ).**
